# Supplementary material for: PdAu alloy nanoparticles supported on nitrogen-doped carbon black as highly active catalysts for Ullmann coupling and nitrophenol hydrogenation reactions
Source: Royal Society of Chemistry journal article supplement (doi:10.1039/c9ra01685f), 2019-01-01
Supplement: c9ra01685f1.pdf [file c9ra01685f1.pdf]

### Supporting information

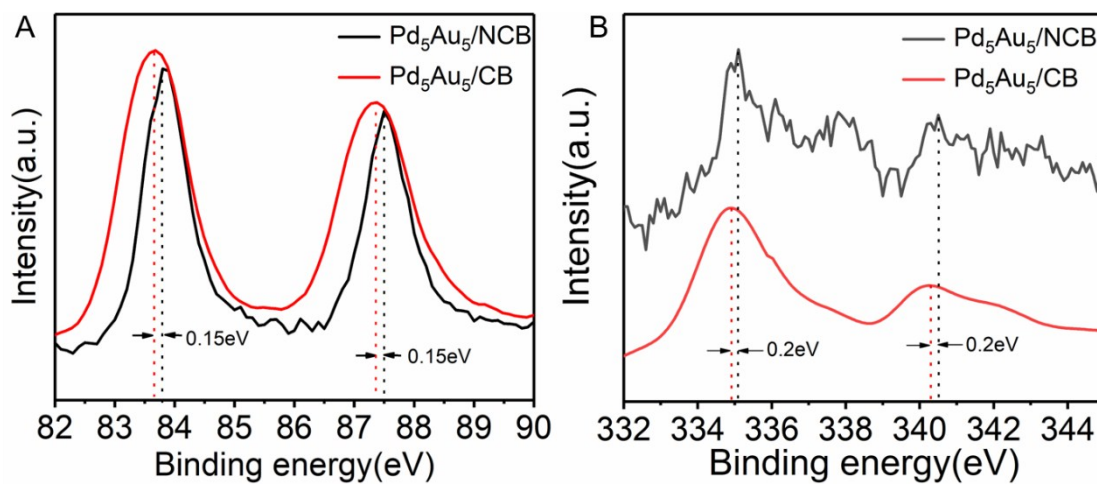

Fig.S1 XPS spectra of Au 4f (A) and Pd 3d (B) of Pd<sub>5</sub>Au<sub>5</sub>/NCB and Pd<sub>5</sub>Au<sub>5</sub>/CB

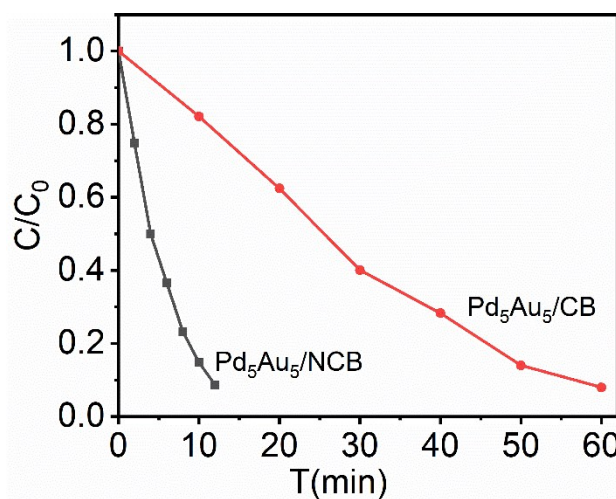

Fig. S2  $c/c_0$  against reaction time for the hydrogenation of 4-NP over Pd<sub>5</sub>Au<sub>5</sub>/NCB and Pd<sub>5</sub>Au<sub>5</sub>/CB

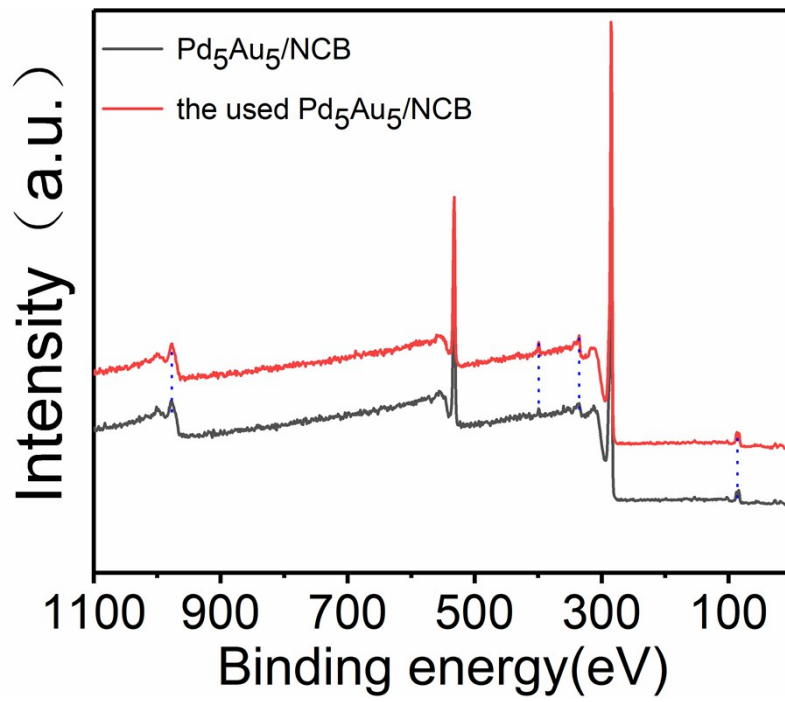

**Fig. S3** XPS spectrum of fresh and used Pd<sub>5</sub>Au<sub>5</sub>/NCB

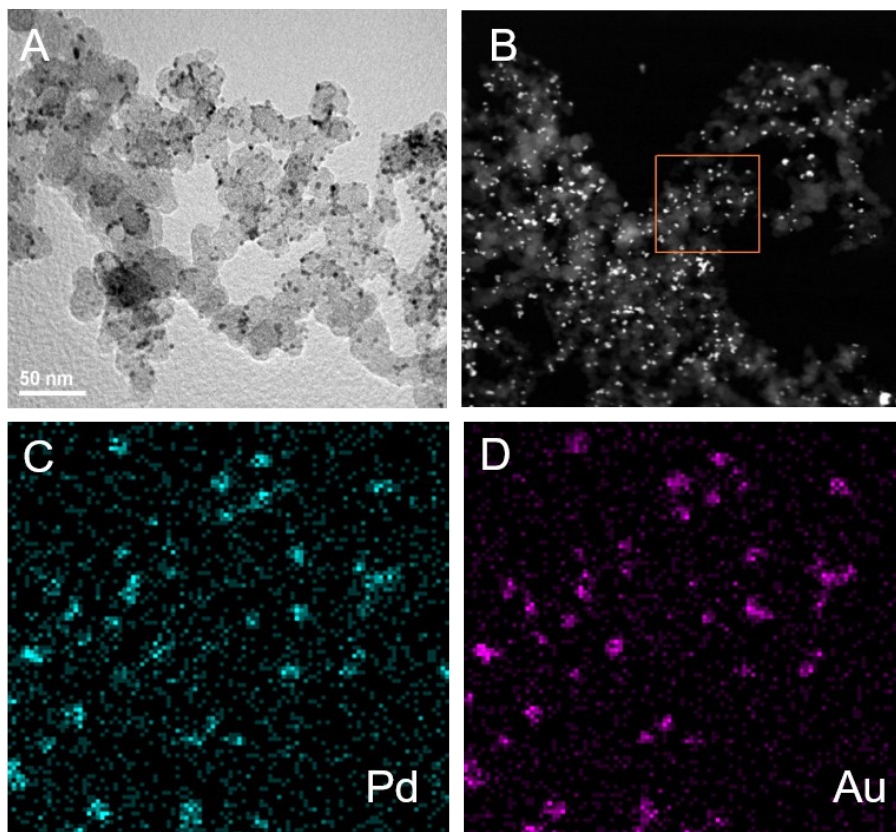

**Fig. S4** (A) TEM image (B) HAADF-STEM images of Pd<sub>5</sub>Au<sub>5</sub>/NCB after 10 cycle (C) EDS mapping of Pd (D) EDS mapping of Au element

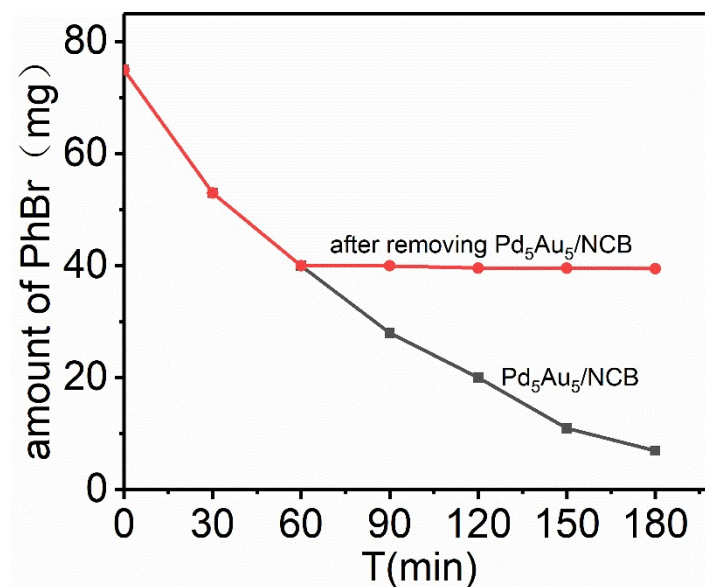

**Fig. S5** Amount of PhBr at different time with and without Pd<sub>5</sub>Au<sub>5</sub>/NCB

**Table. S1** concentration of Pd and Au before and after 10 cycles by ICP

| Element | Before reaction<br>(mg/L) | After tenth cycle<br>(mg/L) | Leaching (mg/L) |
|---------|---------------------------|-----------------------------|-----------------|
| Pd      | 2.2409                    | 2.1281                      | 0.1128          |
| Au      | 4.1325                    | 3.9136                      | 0.2189          |

**Table. S1** concentration of Pd and Au before and after 10 cycles by ICP
